# Supplementary material for: In vivo fluorescence imaging of conjunctival goblet cells
Source: PubMed Central journal article supplement (PMC6820527; doi:10.1038/s41598-019-51893-4), 2019-10-29
Supplement: 41598_2019_51893_MOESM1_ESM.pdf [file 41598_2019_51893_MOESM1_ESM.pdf]

# **Supplementary Information**

## **In vivo fluorescence imaging of conjunctival goblet cells**

Seonghan Kim<sup>1</sup>, Seunghun Lee<sup>1</sup>, Hoonchul Chang<sup>2</sup>, Moses Kim<sup>3</sup>, Myoung Joon Kim<sup>3,4,\*</sup>,  
Ki Hean Kim<sup>1,2,\*</sup>

**Affiliations:**

<sup>1</sup>Department of Mechanical Engineering, Pohang University of Science and Technology, 77 Cheongam-ro, Nam-gu, Pohang, Gyeongbuk 37673, Rep. of Korea

<sup>2</sup>Division of Integrative Biosciences and Biotechnology, Pohang University of Science and Technology, 77 Cheongam-ro, Nam-gu, Pohang, Gyeongbuk 37673, Rep. of Korea

<sup>3</sup>Department of Ophthalmology, Ulsan College of Medicine, Asan Medical Center, 88 Olympic-ro 43-gil, Songpa-gu, Seoul 05505, Rep. of Korea

<sup>4</sup>SNU Seoul Eye Clinic, 624 Gangnam-daero, Gangnam-gu, Seoul 06035, Rep. of Korea

Email addresses: Seonghan Kim (seonghan@postech.ac.kr), Seunghun Lee (laserman@postech.ac.kr), Hoonchul Chang (hcjang1108@gmail.com), Moses Kim (bswc28@hanmail.net), Myoung Joon Kim (mjmjkim@gmail.com), Ki Hean Kim (kiheankim@postech.ac.kr),

\*: corresponding authors

## Contents

### List of Supplementary Videos

|                              |                                                                                                         |
|------------------------------|---------------------------------------------------------------------------------------------------------|
| <b>Supplementary Video 1</b> | Real-time confocal fluorescence microscopy (CFM) video of the rat bulbar conjunctiva, <i>in-vivo</i>    |
| <b>Supplementary Video 2</b> | Real-time confocal fluorescence microscopy (CFM) video of the rat forniceal conjunctiva, <i>in-vivo</i> |

## **Supplementary Video & Legends**

**Supplementary Video 1:** Real-time confocal fluorescence microscopy (CFM) video of the rat bulbar conjunctiva, in-vivo. (Corresponding to Fig. 3(a))

The image size consists of  $512 \times 512$  pixels covering a field-of-view (FOV) of  $387.5 \mu\text{m} \times 387.5 \mu\text{m}$  with a Imaging speed was 7.3 frames/s. Color coding for emission fluorescence was as follows: 430 ~ 650 nm (*green*).

**Supplementary Video 2:** Real-time confocal fluorescence microscopy (CFM) video of the rat forniceal conjunctiva, in-vivo. (Corresponding to Fig. 3(b))

The image size consists of  $512 \times 512$  pixels covering a field-of-view (FOV) of  $387.5 \mu\text{m} \times 387.5 \mu\text{m}$  with a Imaging speed was 7.3 frames/s. Color coding for emission fluorescence was as follows: 430 ~ 650 nm (*green*).
